# Supplementary material for: Forkhead Transcription Factors (FoxOs) Promote Apoptosis of Insulin-Resistant Macrophages During Cholesterol-Induced Endoplasmic Reticulum Stress
Source: Oxford University Press journal article supplement (doi:10.2337/db08-0520), 2008-08-27

**Supplementary Information**

# Research Design and Methods

**PCR genotyping of FoxO1/3/4 in differentiated macrophages**

Genomic DNA was extracted from bone marrow derived macrophages (BMM) at day 10 and Con A-elicited peritoneal macrophages from *FoxO1/3/4* knock-out or control mouse, using DNeasy Tissue Kit (Qiagen). PCR was performed using primers described previously (1; 2).

**Combined knock-down of FoxO1 and FoxO3a in primary macrophages**

siRNA against mouse FoxO3a or control siRNA (Qiagen) was transfected with the FuGENE HD Transfection Reagent (Roche) in DMEM supplemented with 10% FBS and 20% L-cell conditioned medium according to the manufacturer’s protocol. After six hour incubation adenovirus encoding shRNA against mouse FoxO1 or control shRNA was added to culture medium at 500 MOI, then cells were incubated for another 36 hours before treatment.

**NF-B responsive luciferase assay**

Primary peritoneal macrophages were co-transduced with adenovirus expressing a luciferase reporter gene driven by NF-B activation and LacZ for 16 hours, and then treated with or without FC for 10 or 14 hours. Reporter luciferae activity was normalized to -galactosidase activity per unit protein (3).

**References**

1. Castrillon DH, Miao L, Kollipara R, Horner JW, DePinho RA: Suppression of ovarian follicle activation in mice by the transcription factor Foxo3a. *Science* 301:215-218, 2003

2. Paik JH, Kollipara R, Chu G, Ji H, Xiao Y, Ding Z, Miao L, Tothova Z, Horner JW, Carrasco DR, Jiang S, Gilliland DG, Chin L, Wong WH, Castrillon DH, DePinho RA: FoxOs are lineage-restricted redundant tumor suppressors and regulate endothelial cell homeostasis. *Cell* 128:309-323, 2007

3. Hellerbrand C, Jobin C, Iimuro Y, Licato L, Sartor RB, Brenner DA: Inhibition of NFkappaB in activated rat hepatic stellate cells by proteasome inhibitors and an IkappaB super-repressor. *Hepatology* 27:1285-1295, 1998

**Figure S1. Pro-apoptotic roles of FoxO in ER-stressed and insulin resistant macrophages.**

Con A-elicited macrophages were co-transduced or co-transfected with shRNA adenovirus (500 MOI) against mouse FoxO1 and siRNA against mouse FoxO3 or their controls. Knock-down efficiency was assessed by mRNA expression of FoxO1 or FoxO3a in wild type macrophages (A). * *p*< 0.01, significant difference versus control shRNA or siRNA transfected macrophages. After the transfection, macrophages were loaded with FC for 16 hours, then stained for apoptosis assay (B, C).


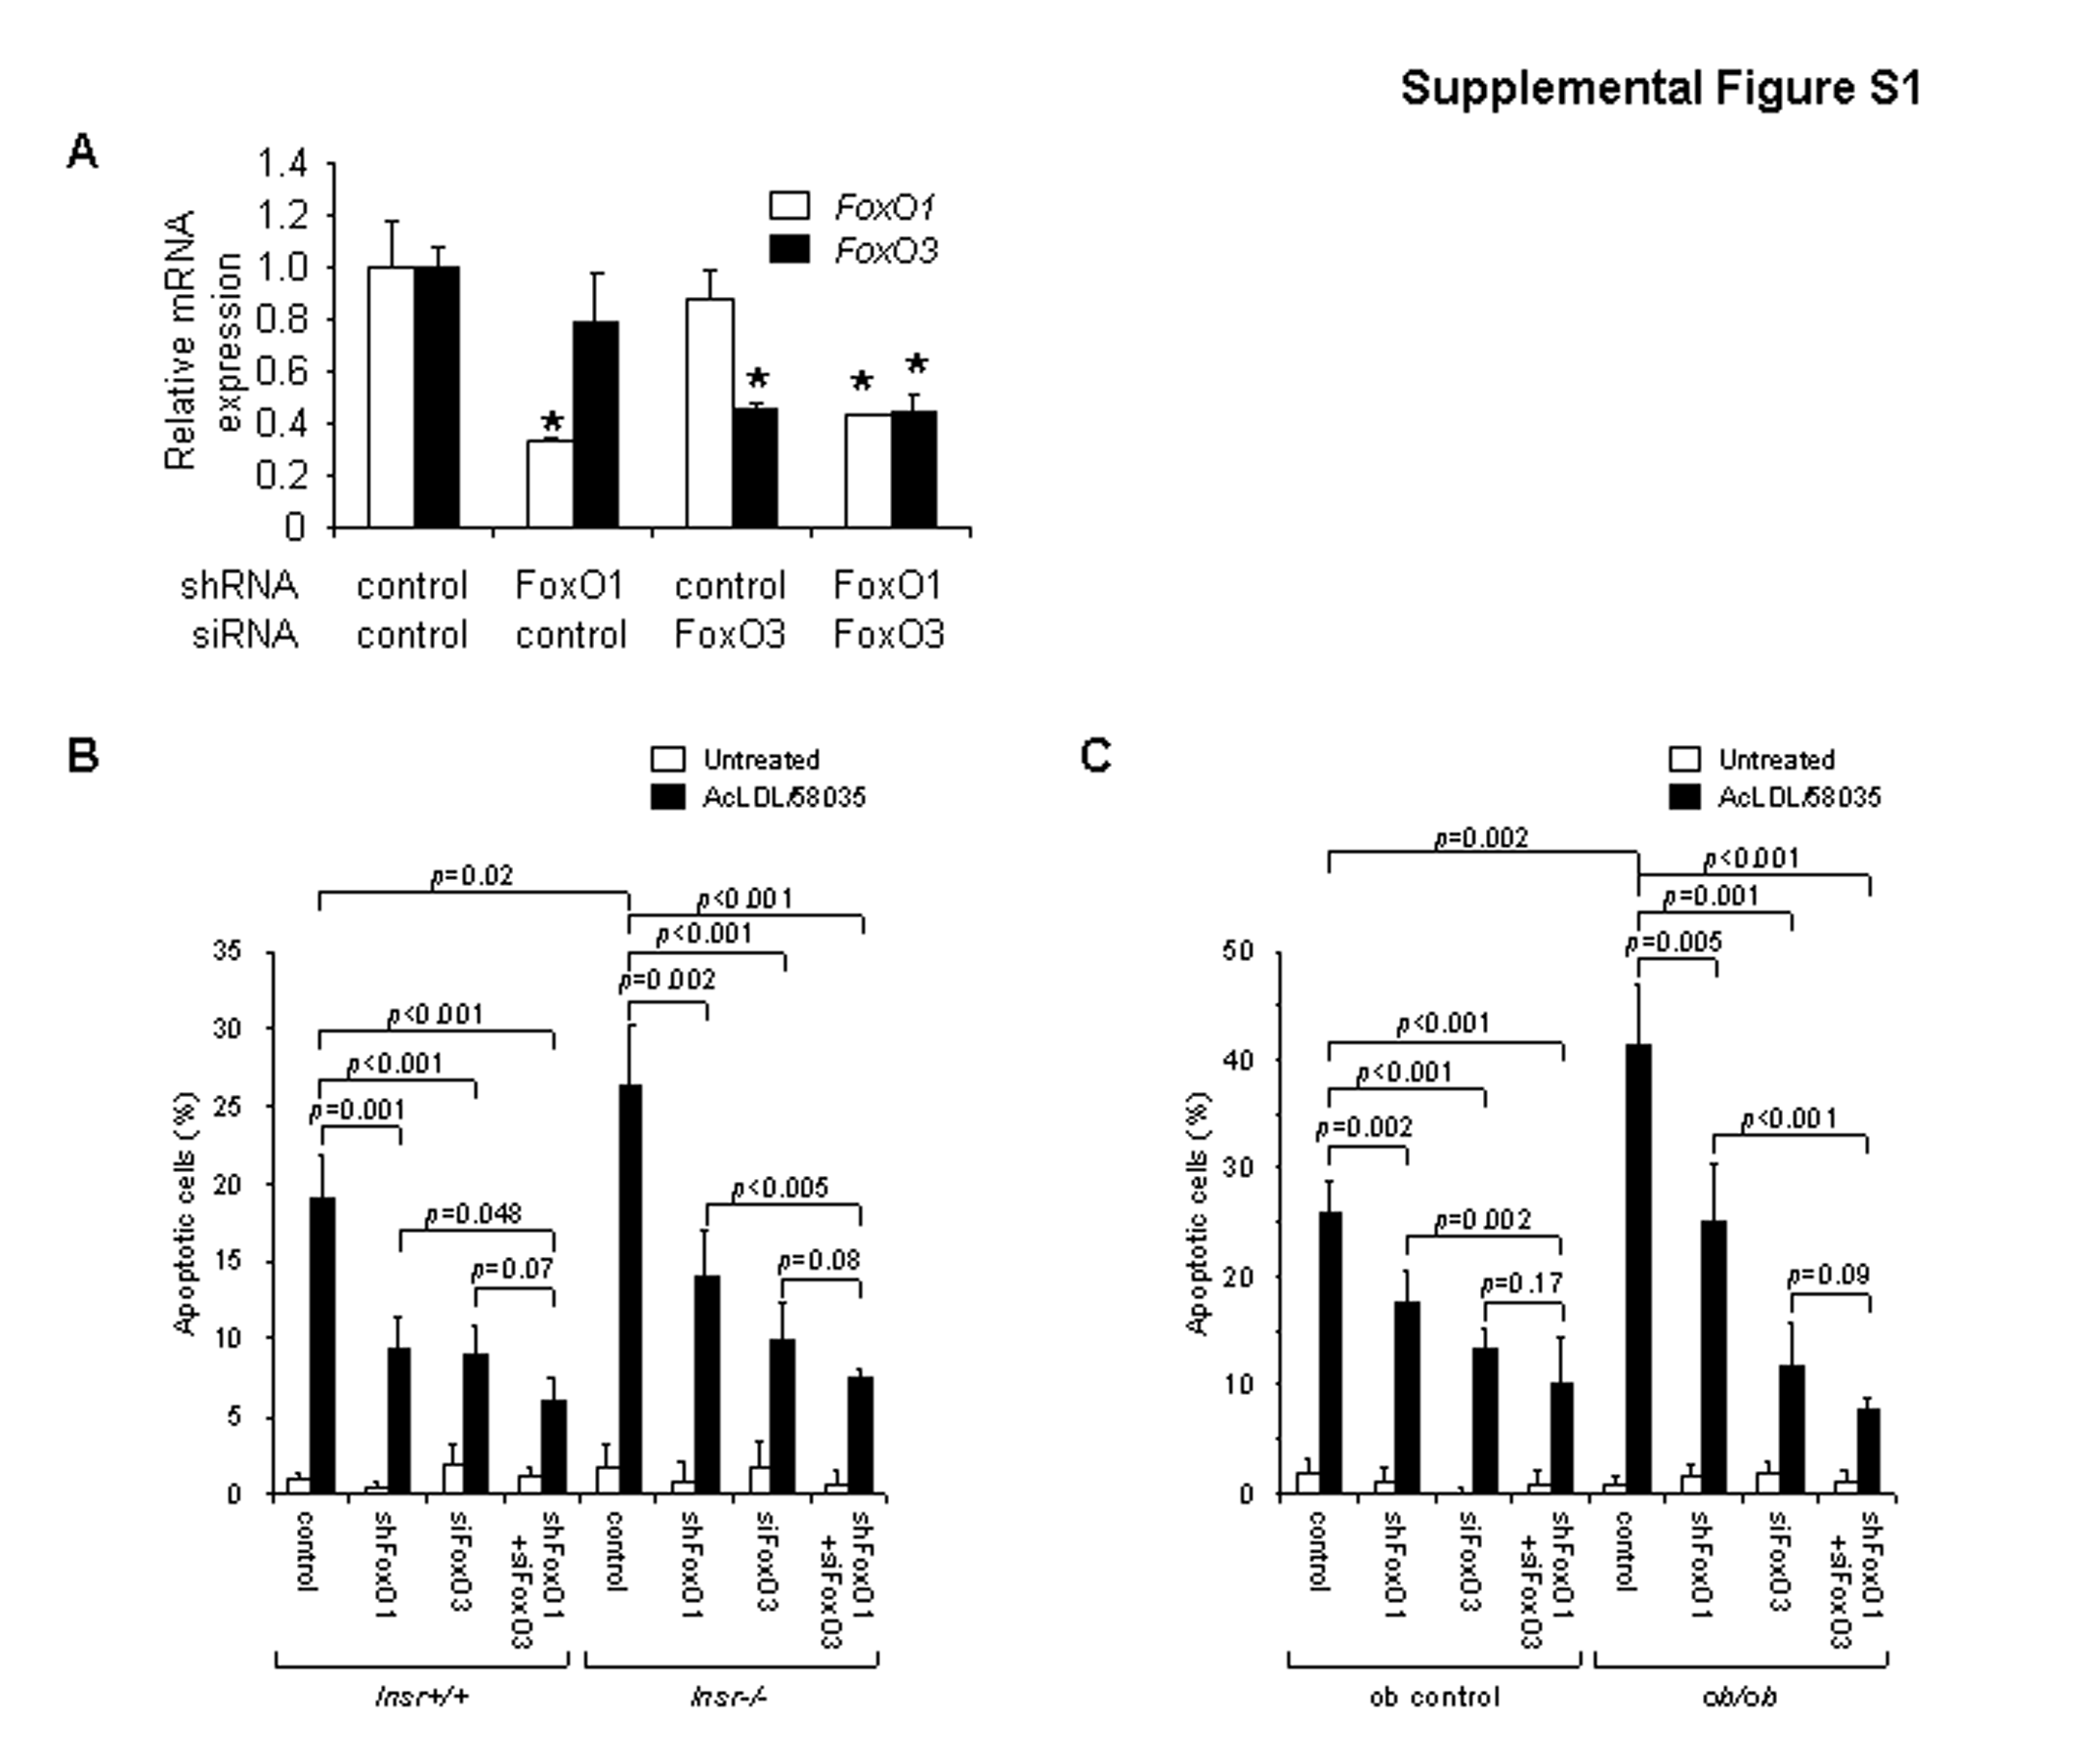


**Figure S2. PCR genotyping of FoxO 1/3/4 in differentiated macrophages.**

PCR genotyping of floxed (L/L) and null alleles (-/-) in bone marrow derived macrophages and Con A-elicited primary peritoneal macrophages. M; DNA size marker. *+/+*; PCR of control DNA extracted from wild type mouse tail.


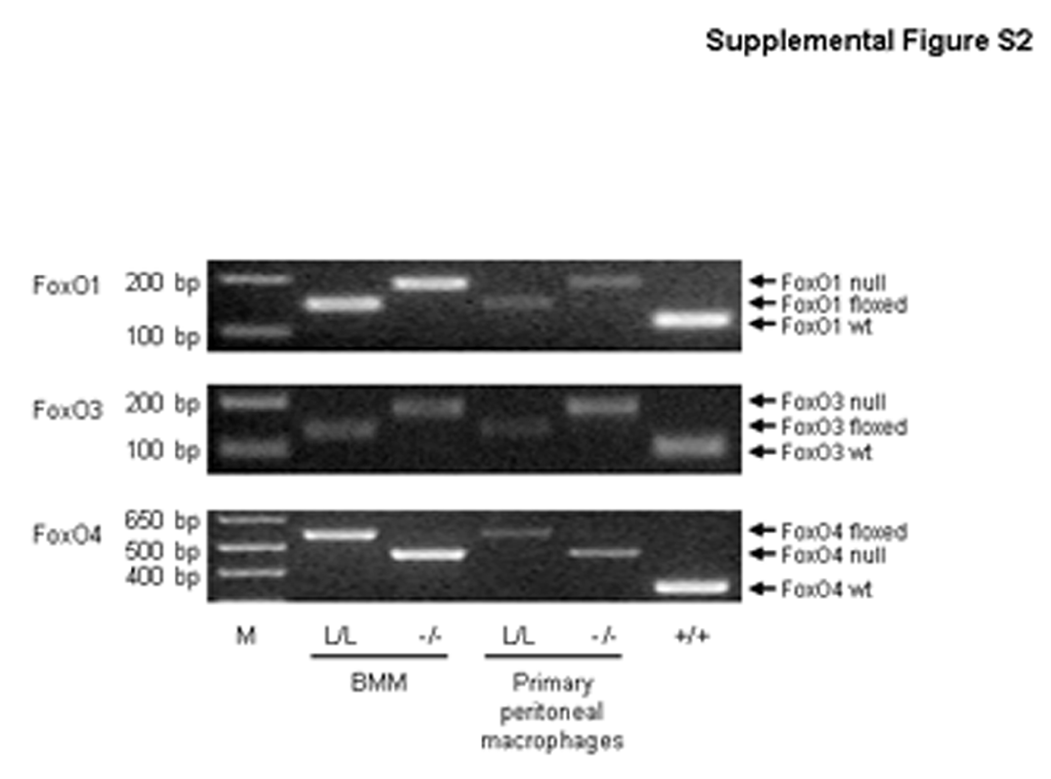


**Figure S3. FoxO does not induce UPR in macrophages.**

Following the adenoviral transduction of FoxO1-ADA, FoxO3-AA or control LacZ, total cell lysate and total RNA from Con A-elicited wild type macrophage was subjected to western blot (A) or q-PCR (B) analysis for FoxOs and CHOP expression. Following the adenoviral transduction with control LacZ or FoxO1-ADA, Con A-elicited wild type macrophages were loaded with FC for six hours then subjected to tRNA extraction and qPCR analysis for CHOP (C). Following the adenoviral transduction with control LacZ or FoxO1-ADA, Con A-elicited wild type macrophages were treated with 50 g/ml Fucoidan 16 hours then subjected to apoptosis assay (D).


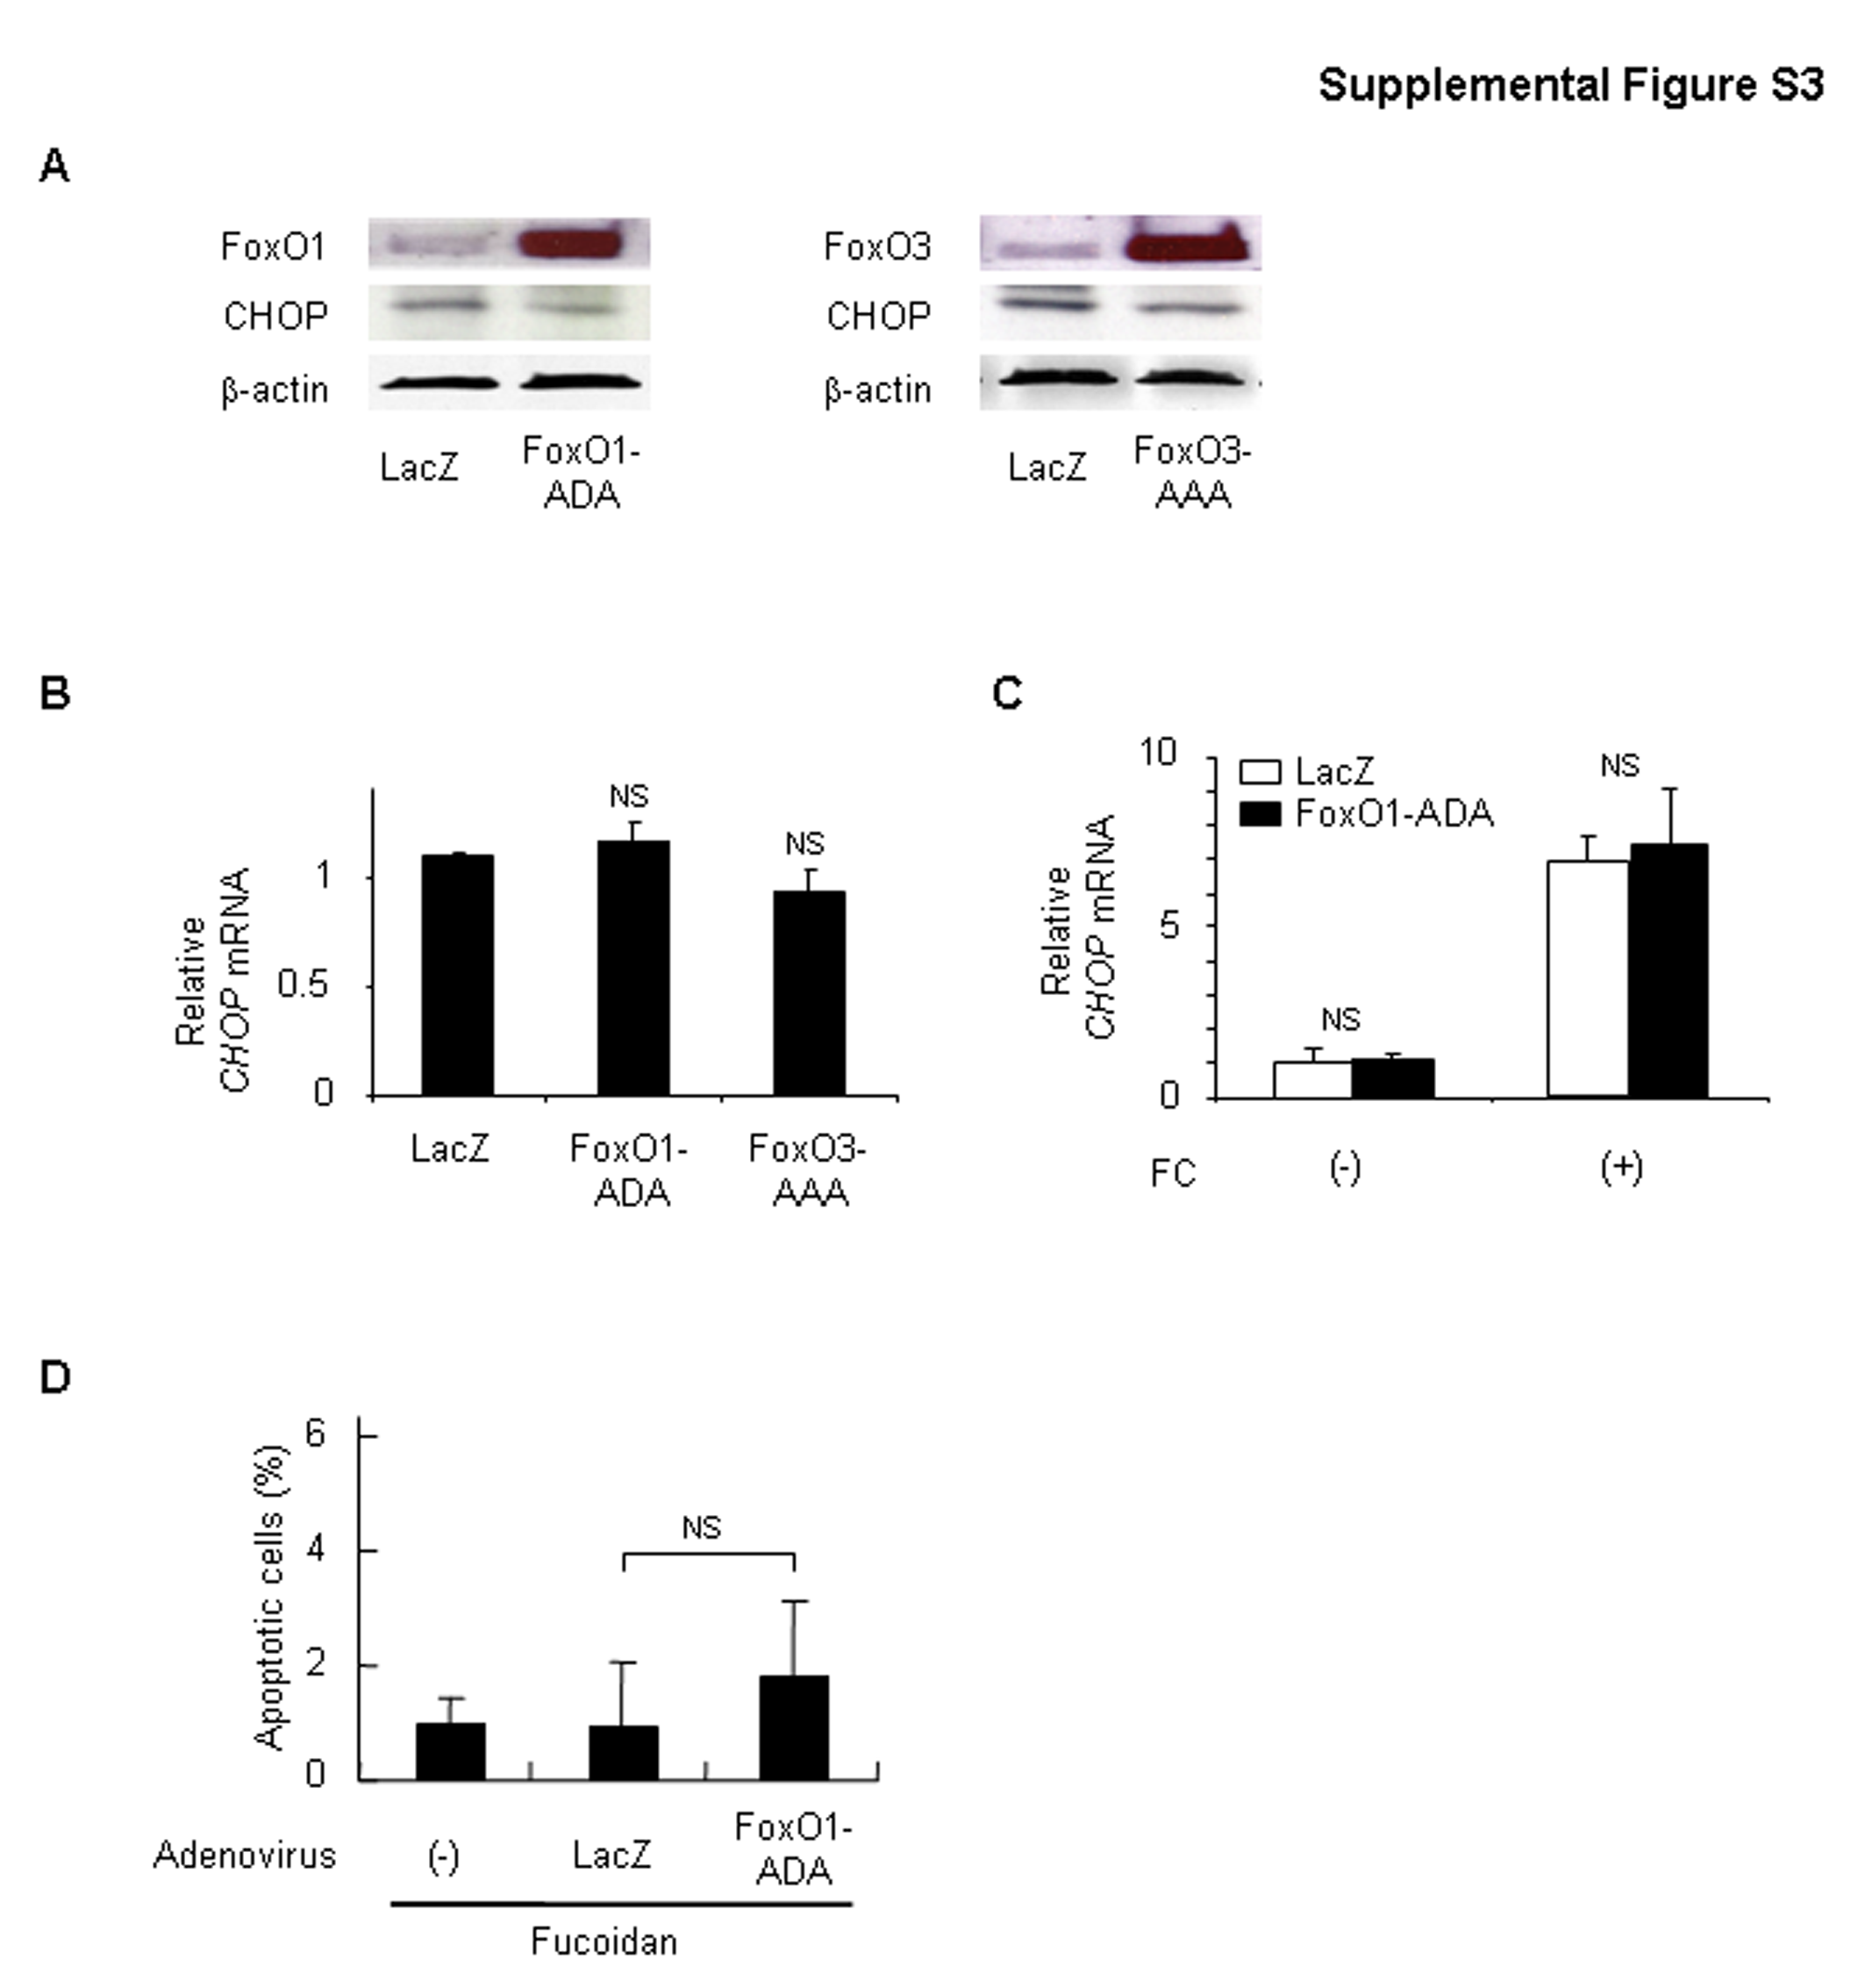


**Figure S4. Anti-apoptotic role of NF-B in FC-induced macrophage apoptosis.**

Con A-elicited macrophages were transduced with adenovirus encoding non-degradable IB; IB-super repressor (IB-SR) and control LacZ at indicated MOIs for 18 hours. Following the transduction, cells were left untreated or were loaded with FC for another 16 hours, then stained with Alexa 488 Annexin V and PI to detect apoptotic cells. The data are expressed as the percent of total cells that stained with Annexin V and PI.


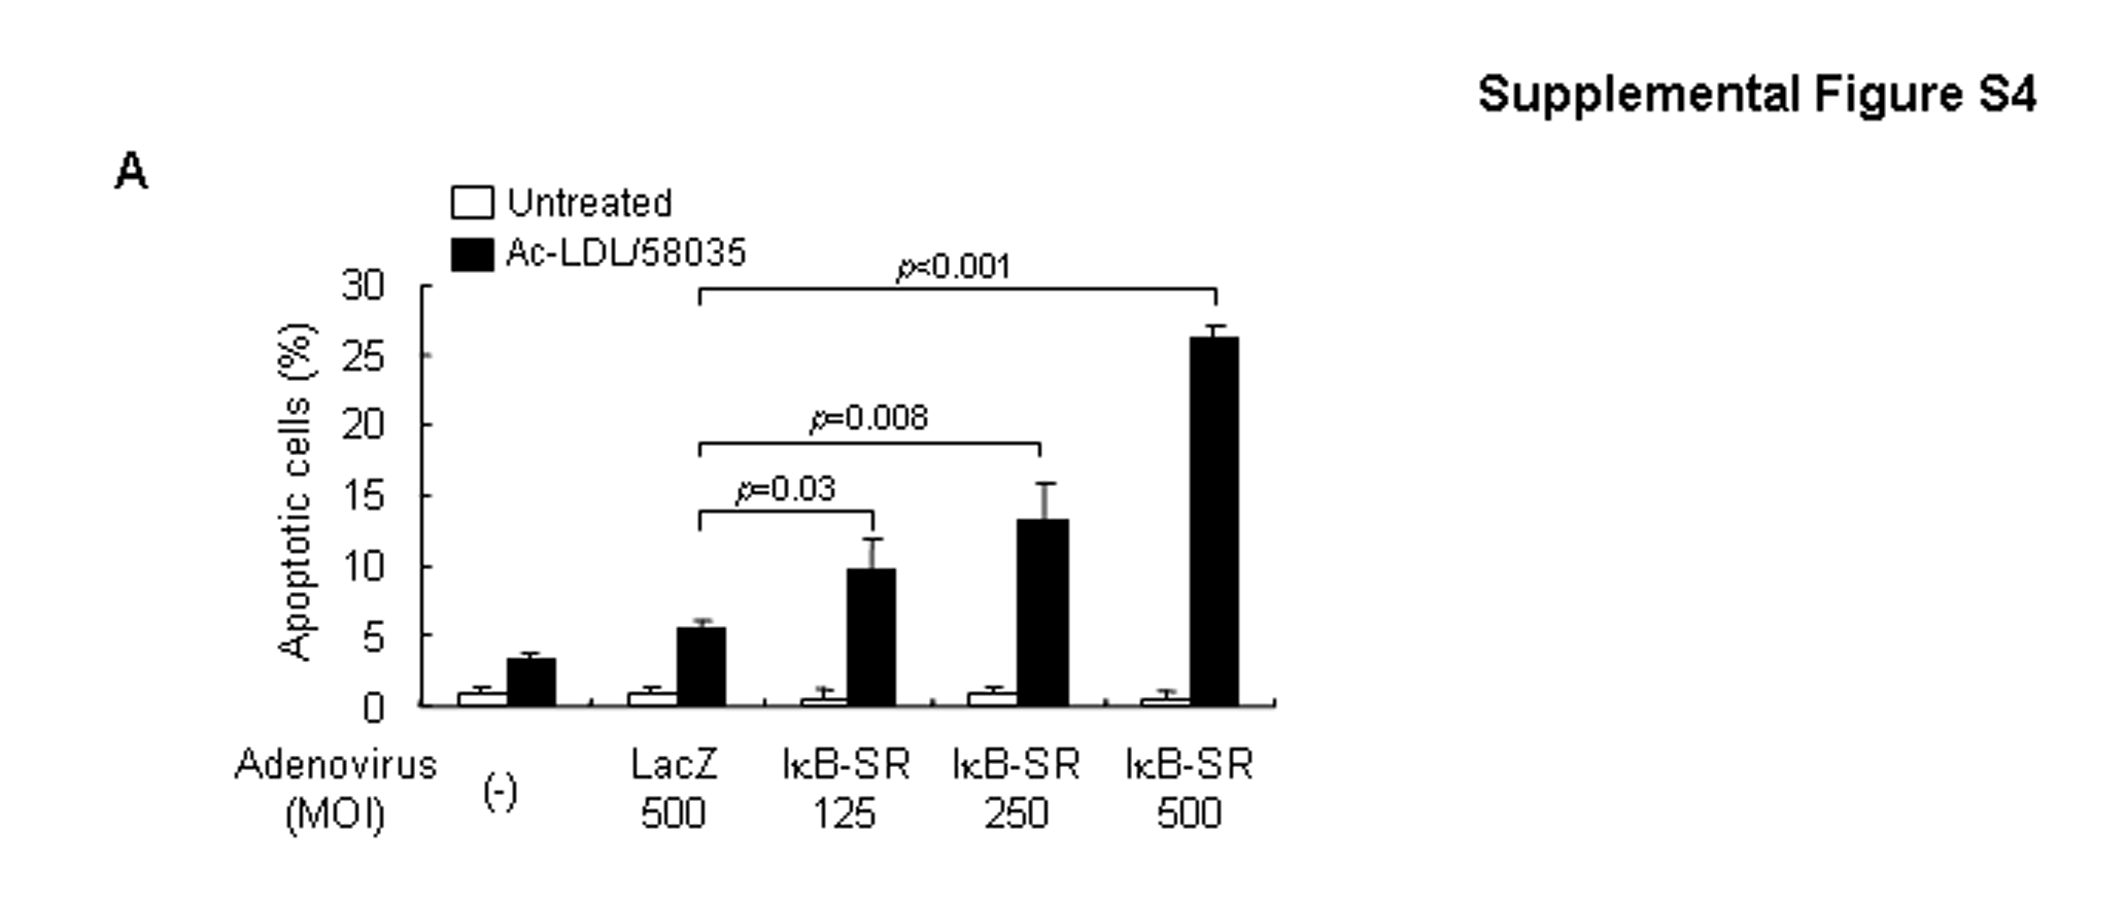


**Figure S5. Attenuated NF-B activity and increased IB in *ob/ob* macrophages.**

Thioglycorate-elicited macrophages from *ob/ob* and control mice were transduced with adenovirus containing NF-kB responsive element with liuciferase reporter constract at 500 MOI for 18 hours. After the transduction, macrophages were left untreated or were loaded with FC for 10 hours, then lysed for measuring Luciferase activity (A). Western blot analysis for IB isoforms in total cell lysate of Con A-elicited macrophages from *ob/ob* and control mice (B) and quantification of bands from three independent experiments (C).


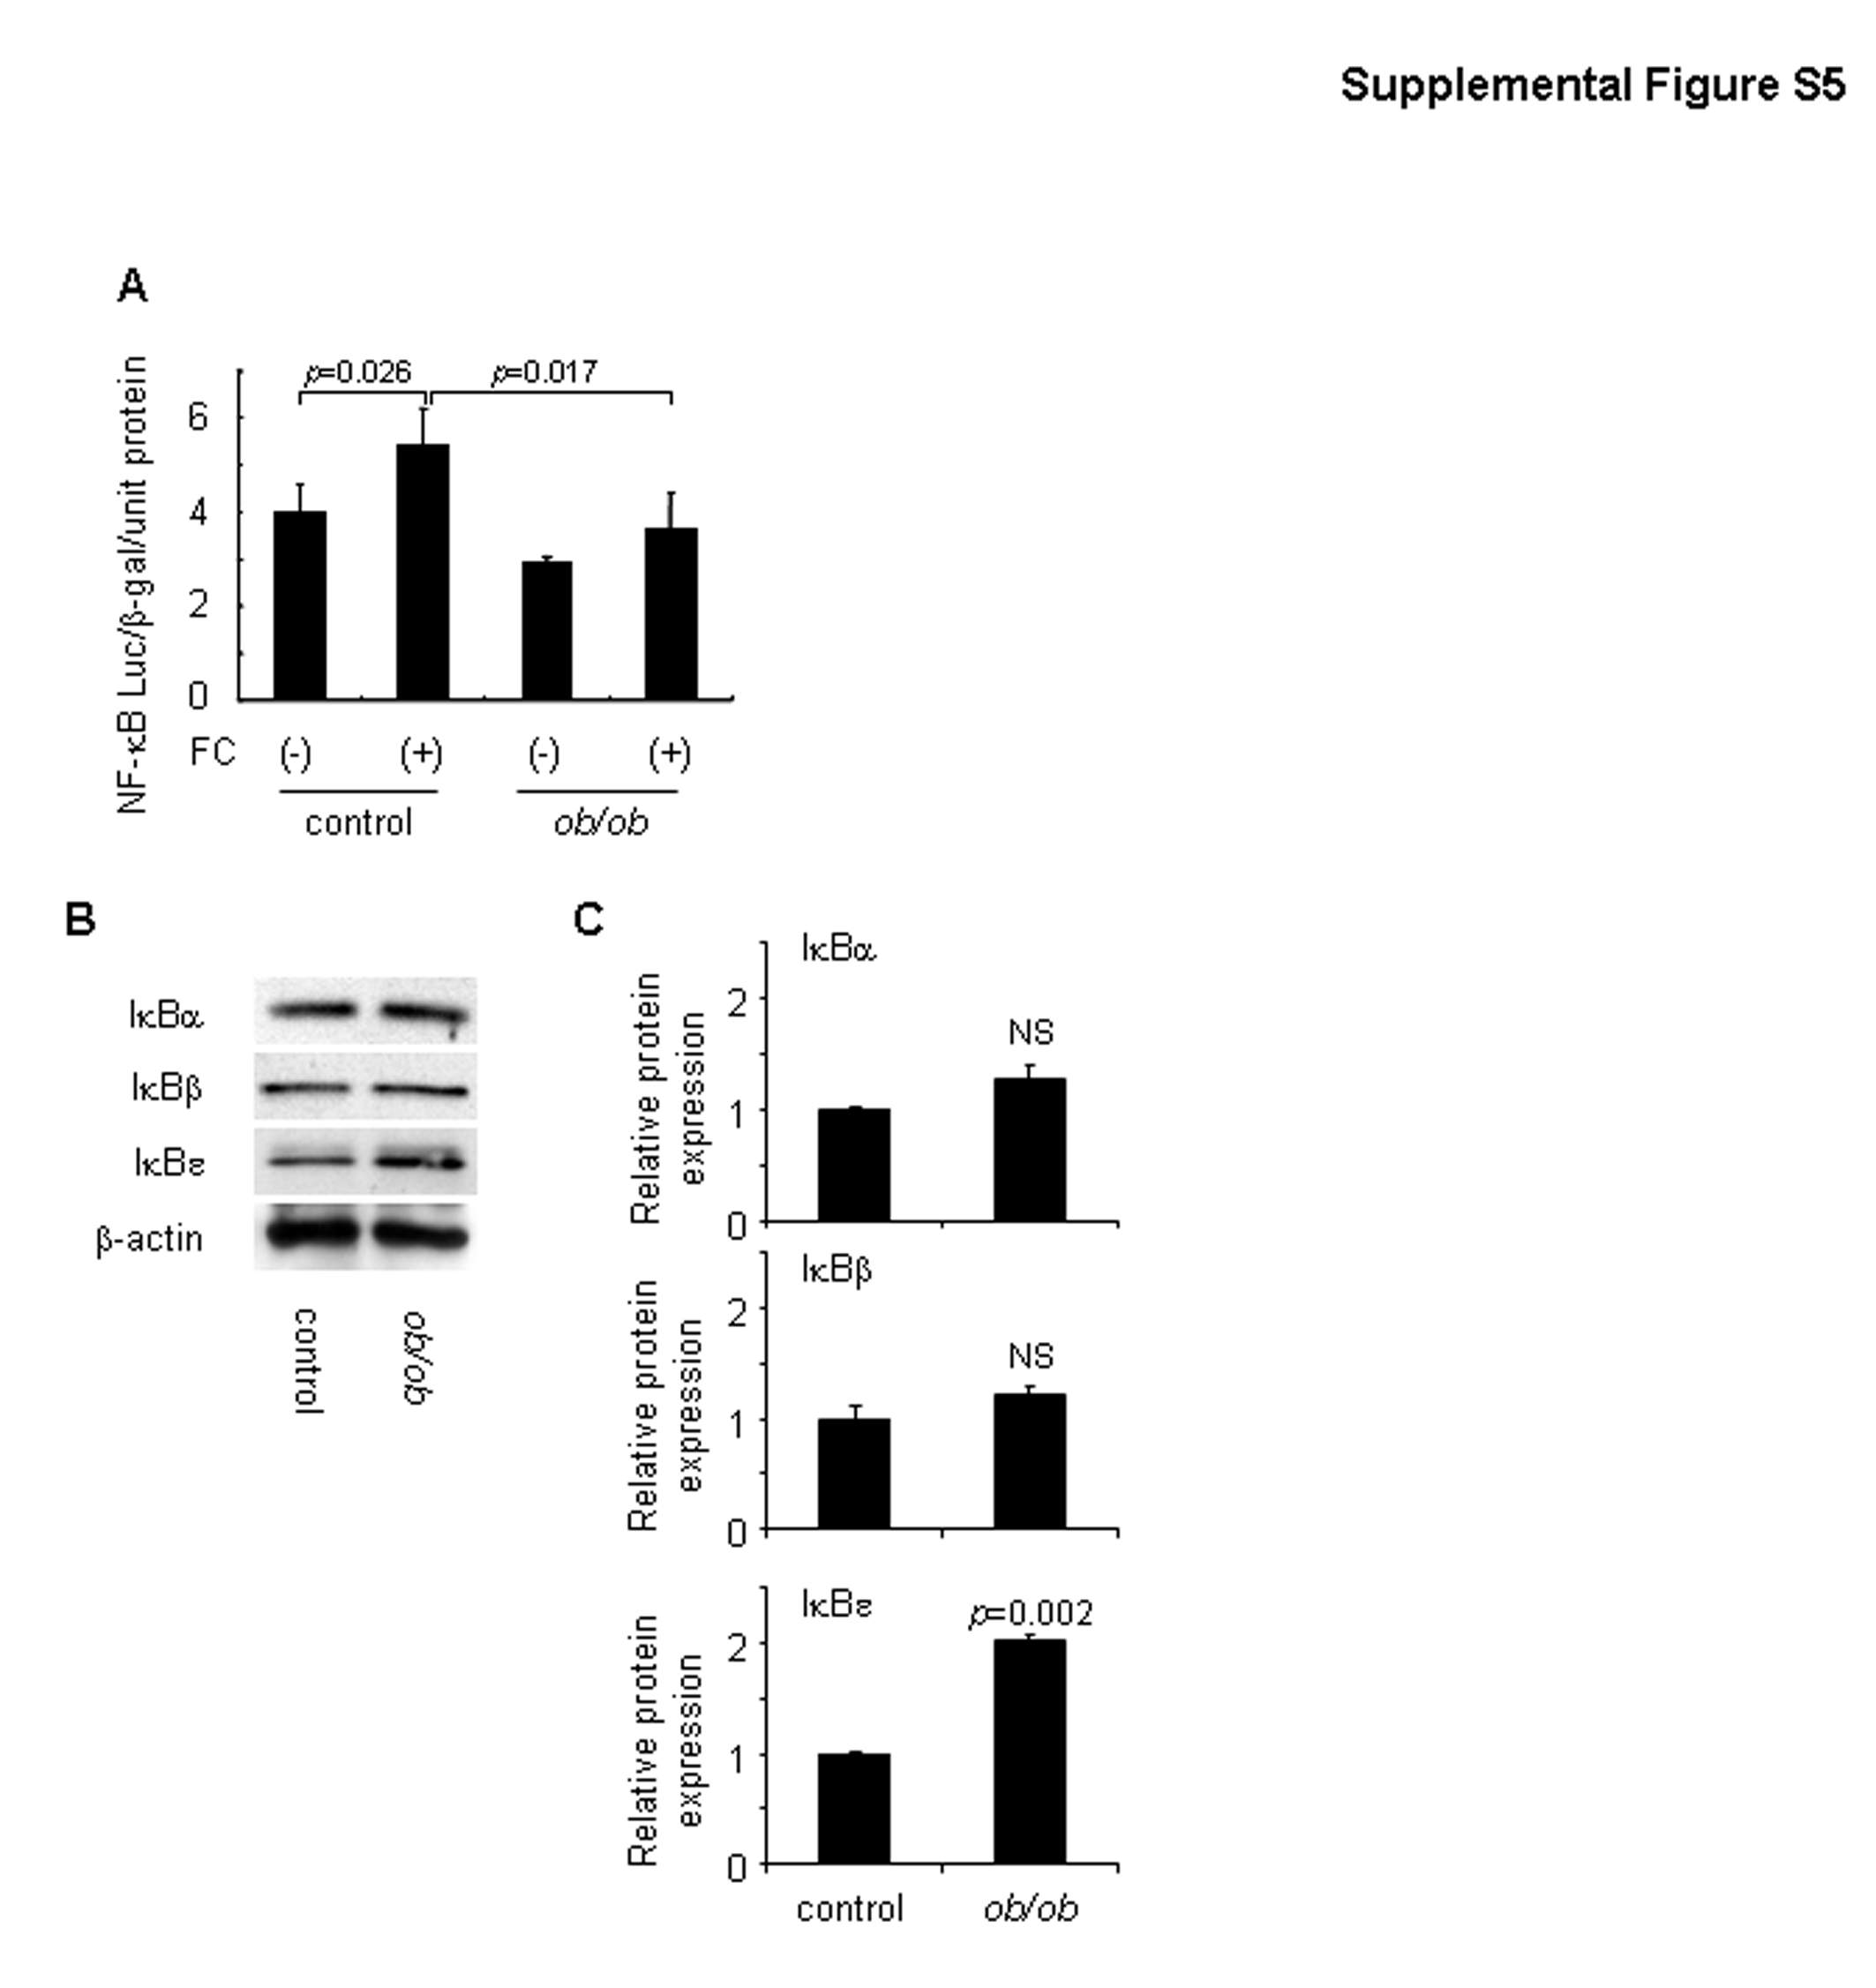


**Figure S6. Bim expression does not correlate with macrophage apoptosis.**

Con A-elicited macrophages macrophages from *Insr-/-* and control mice were left untreated or were loaded with FC for 12 hours. Total cell lysate was subjected to western blot analysis for Bim protein, and mRNA expression was analysed in extracted total RNA.


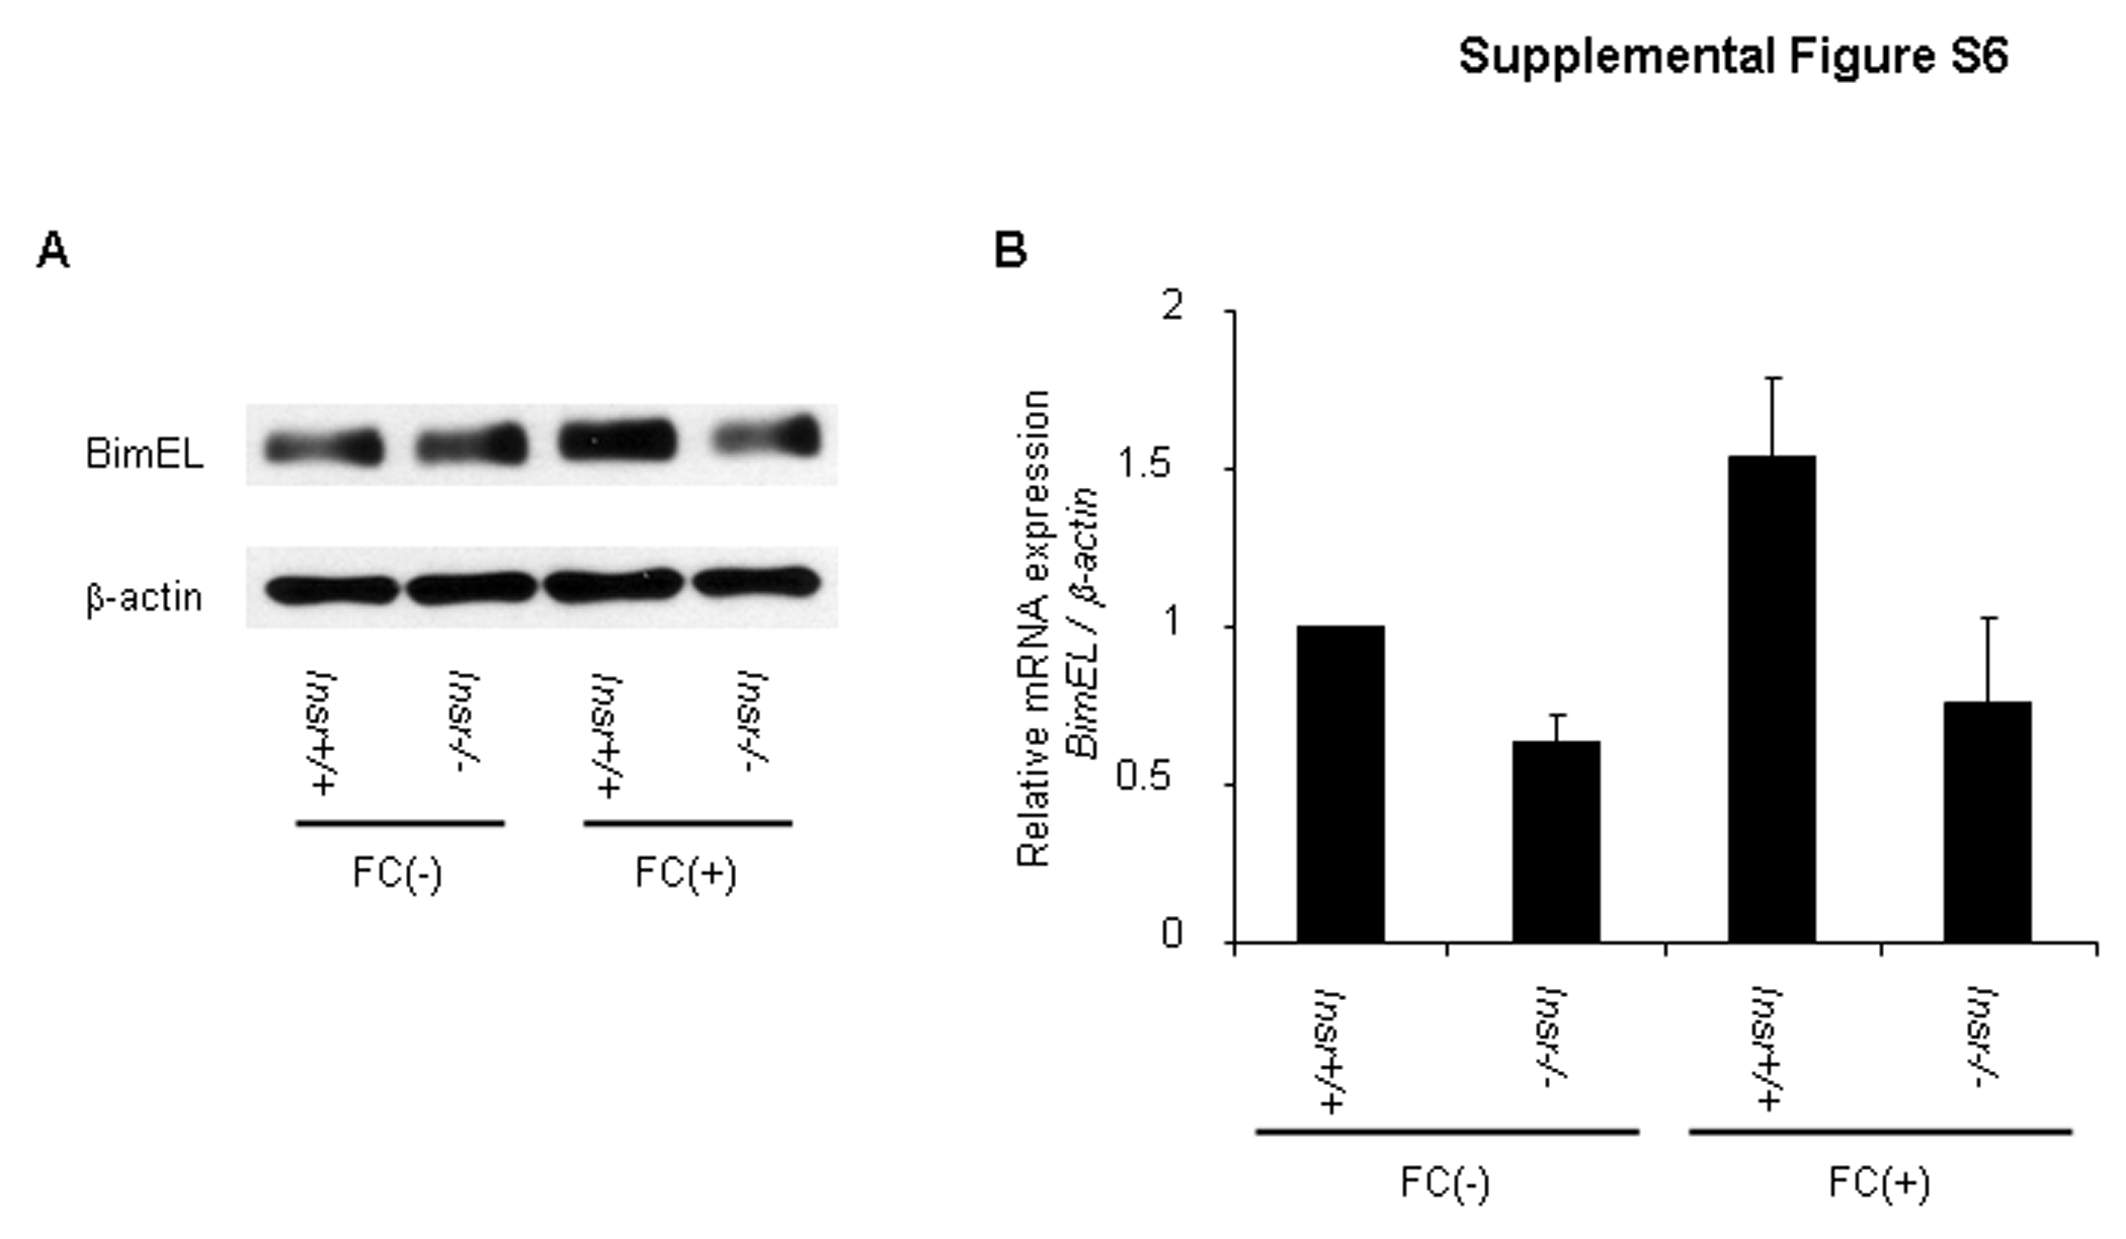

Supplement: db08-05201_suppl.doc [file db08-05201_suppl.doc]
